# Supplementary material for: Comparative performance evaluation and systematic screening of solvents in a range of Grignard reactions
Source: Royal Society of Chemistry journal article supplement (doi:10.1039/c3gc40702k), 2013-01-01

## Supporting Information

### **Comparative Performance Evaluation and Systematic Screening of Solvents in a Range of Grignard Reactions**

**Asha Kadam,<sup>a</sup> Mylinh Nguyen,<sup>a</sup> Michael Kopach,<sup>b</sup> Paul Richardson,<sup>c</sup> Fabrice Gallou,<sup>d</sup> Zhao-Kui Wan,<sup>e</sup> Wei Zhang,<sup>a\*</sup>**

$^1\text{H}$  NMR,  $^{13}\text{C}$  NMR, LC-MS of the Grignard products **2**, **7**, **8**, **10**, and **11**.

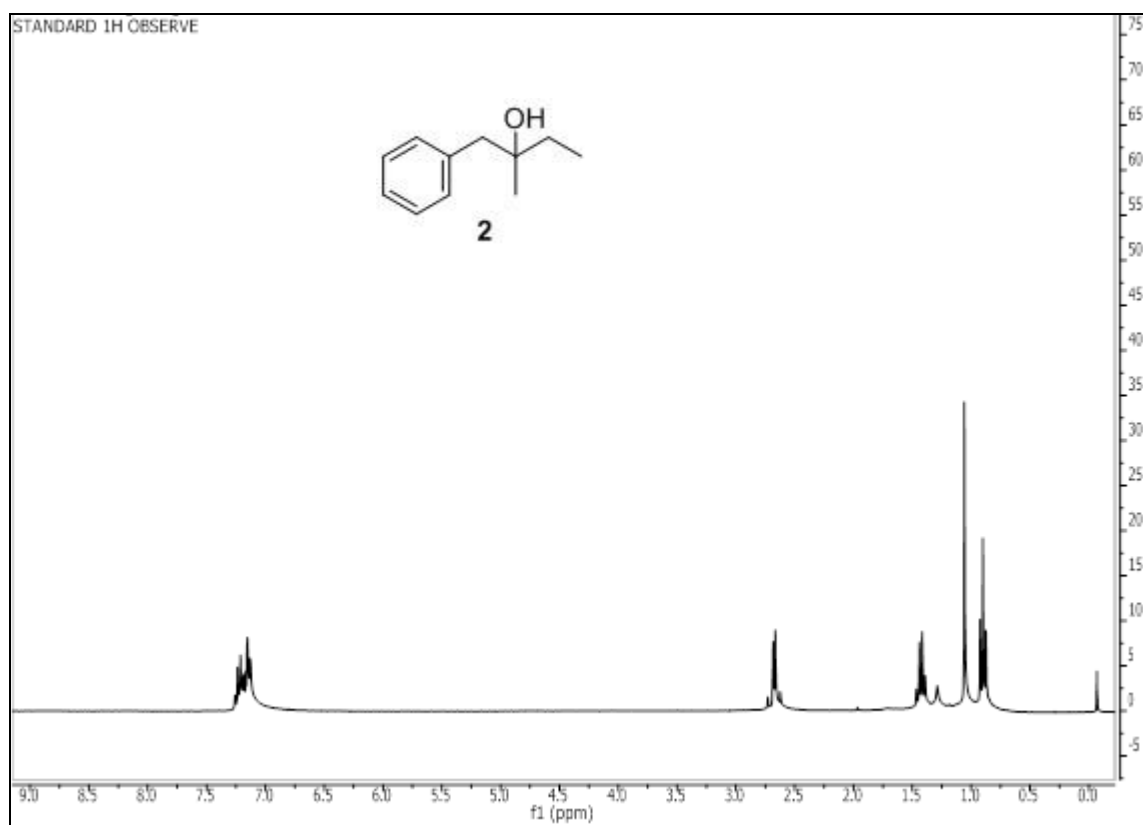

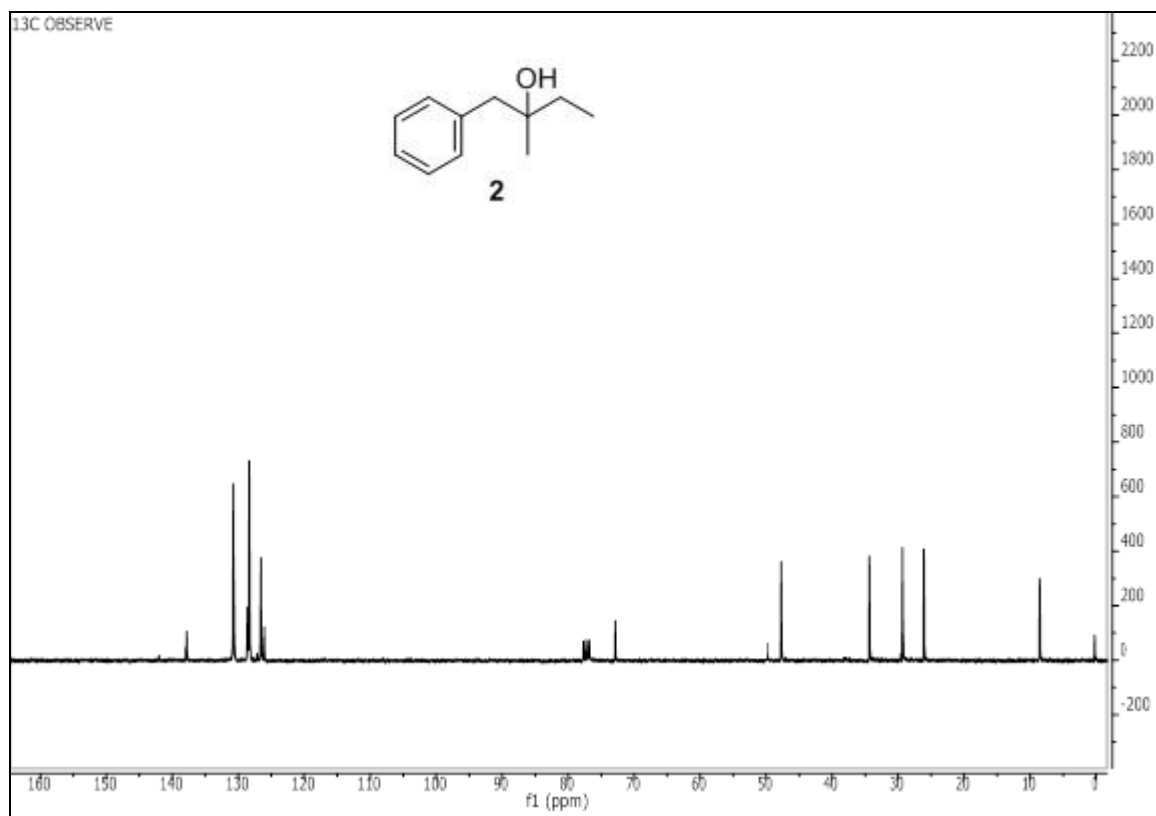

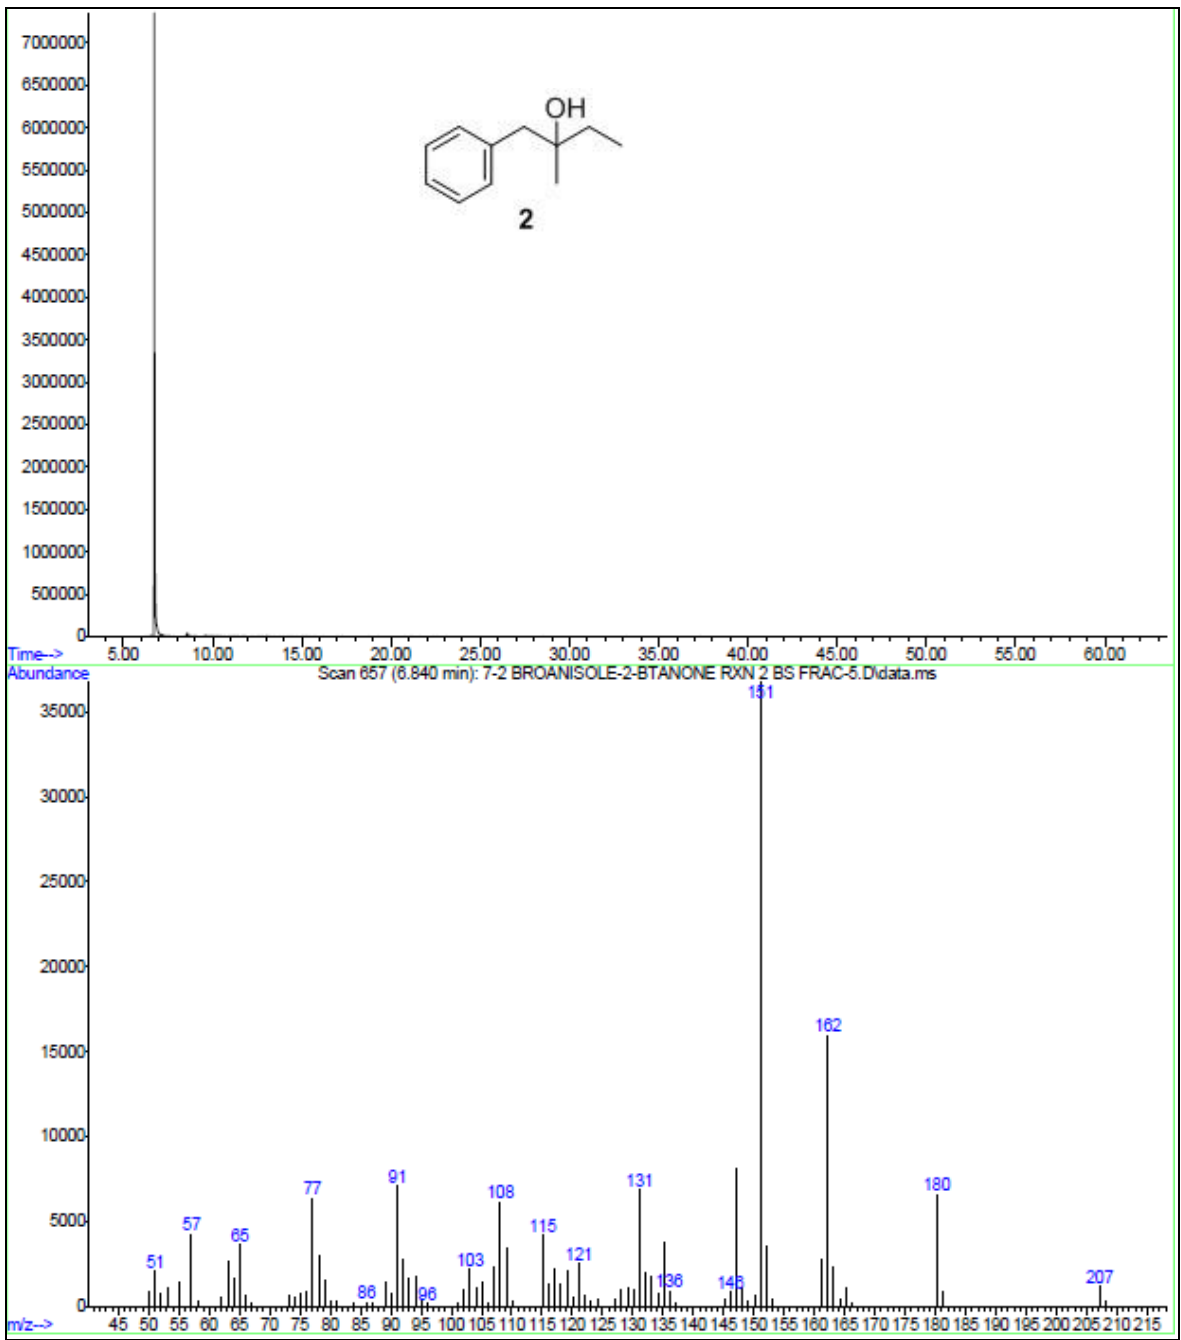

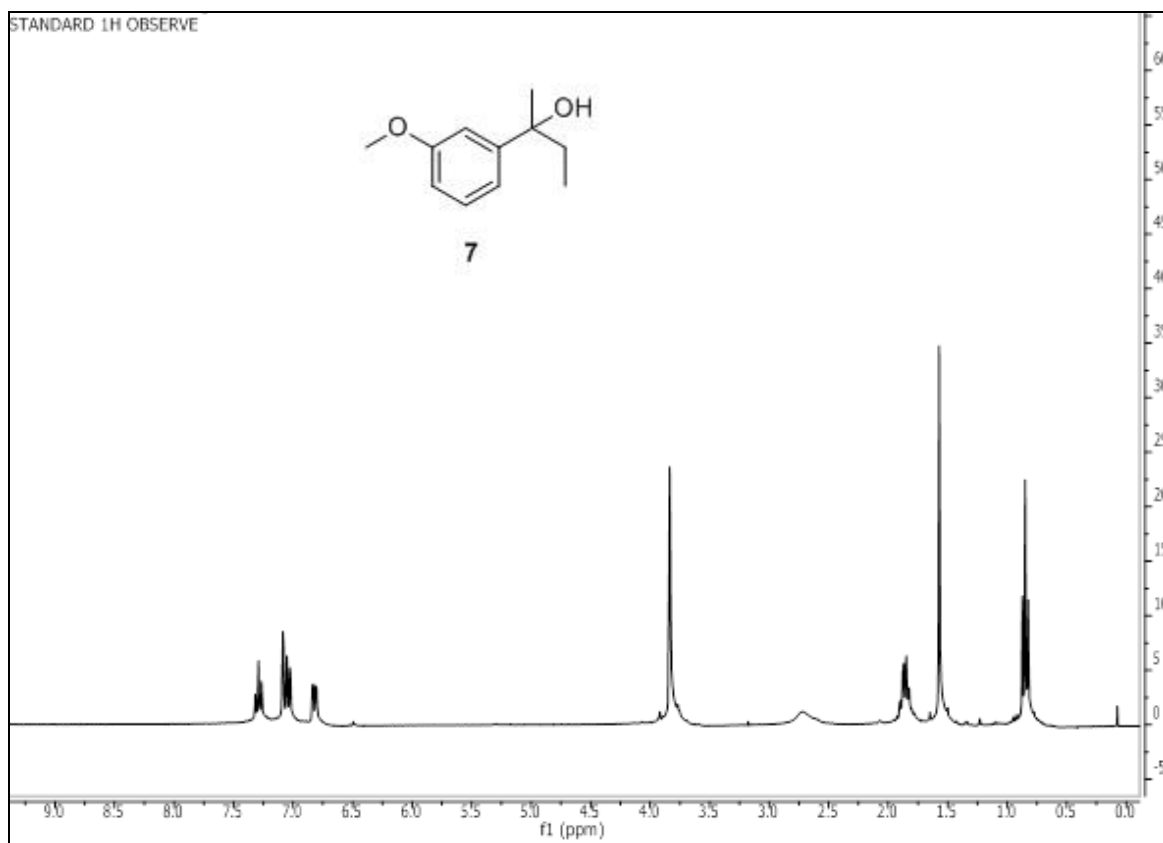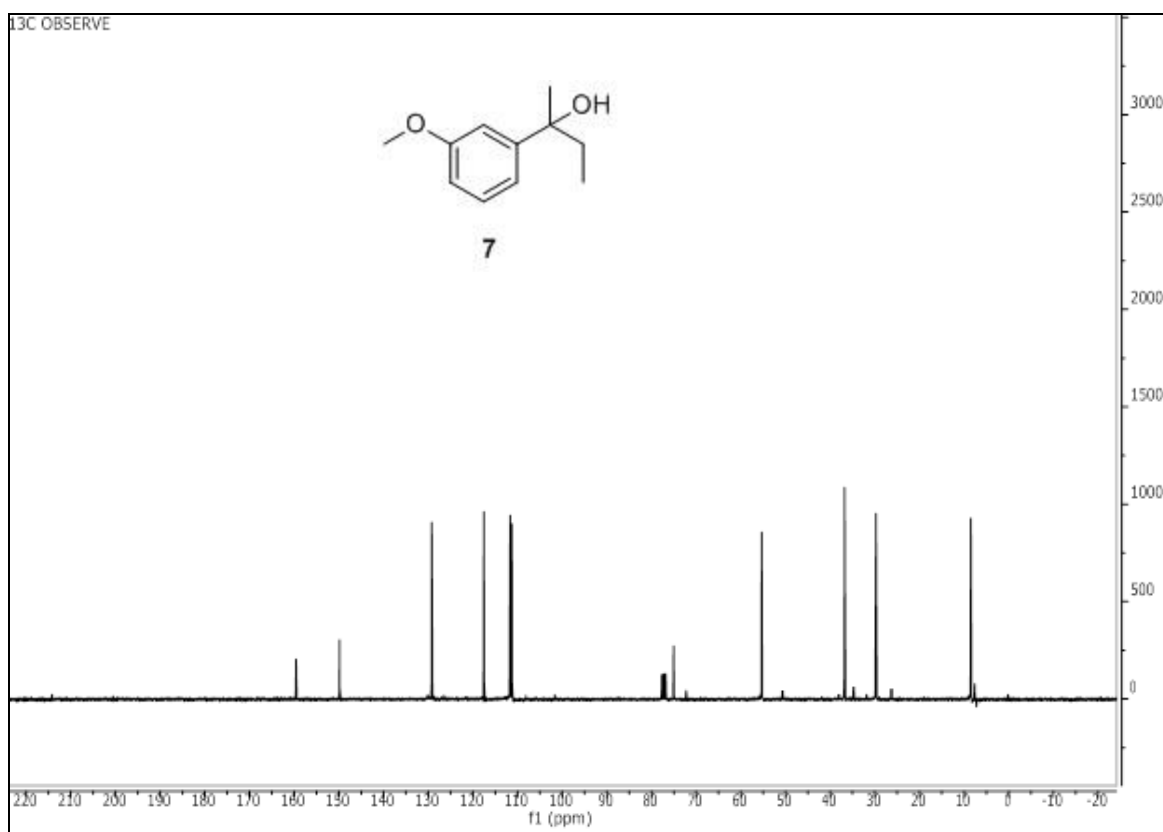

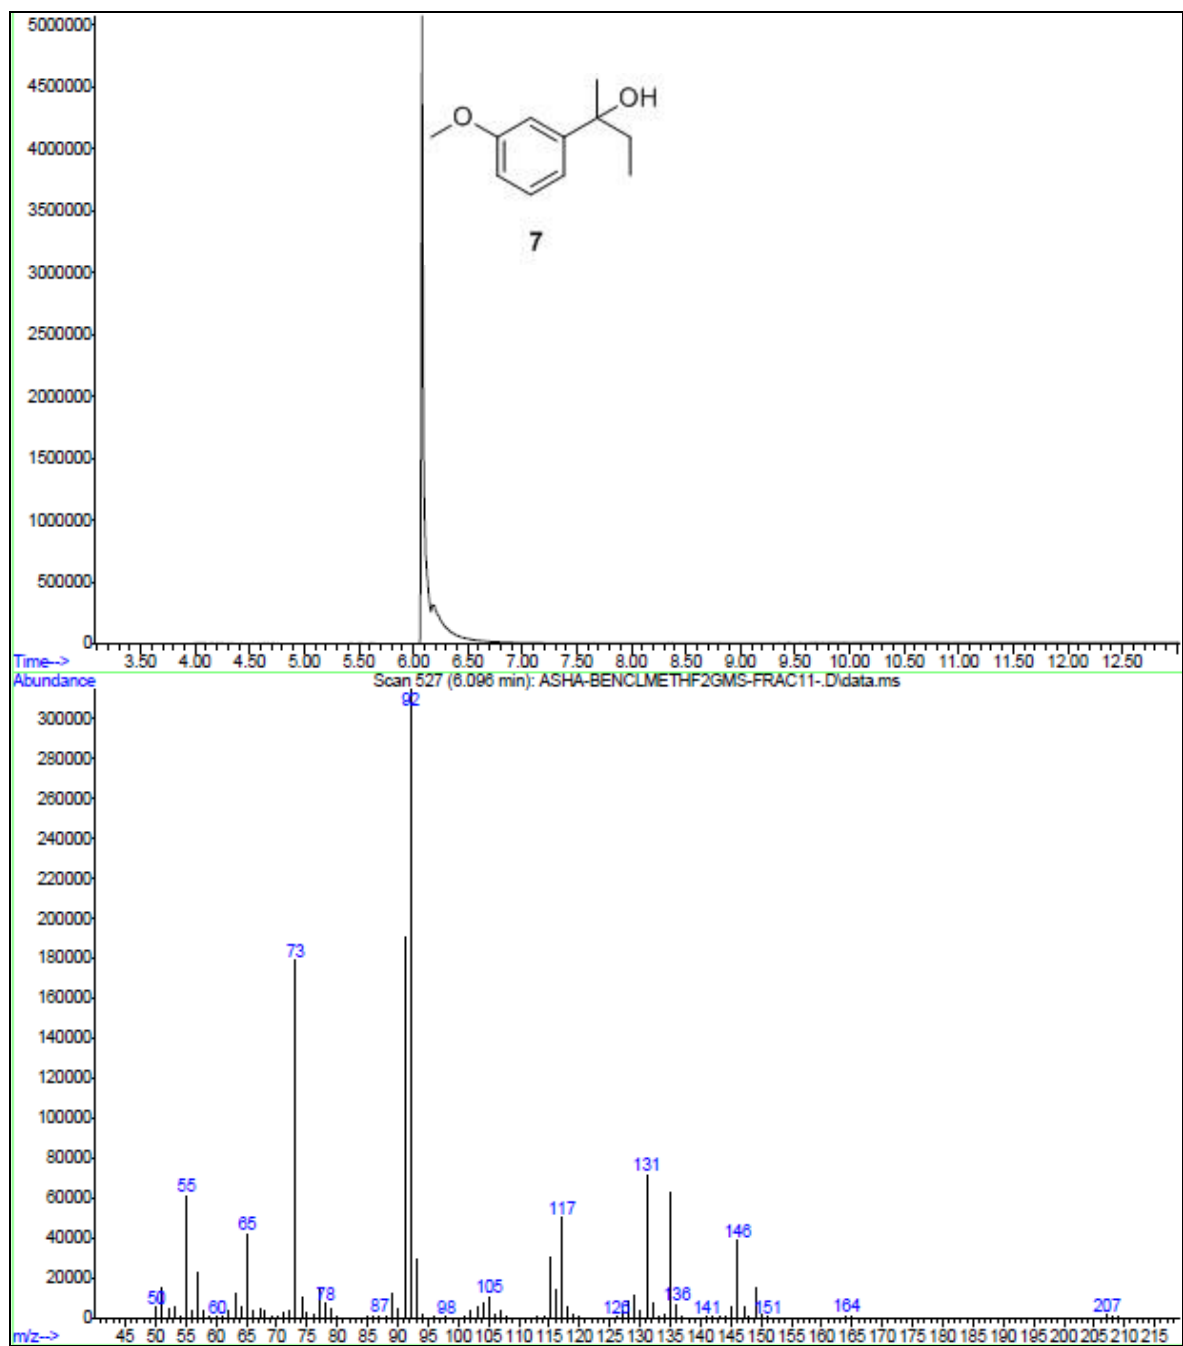

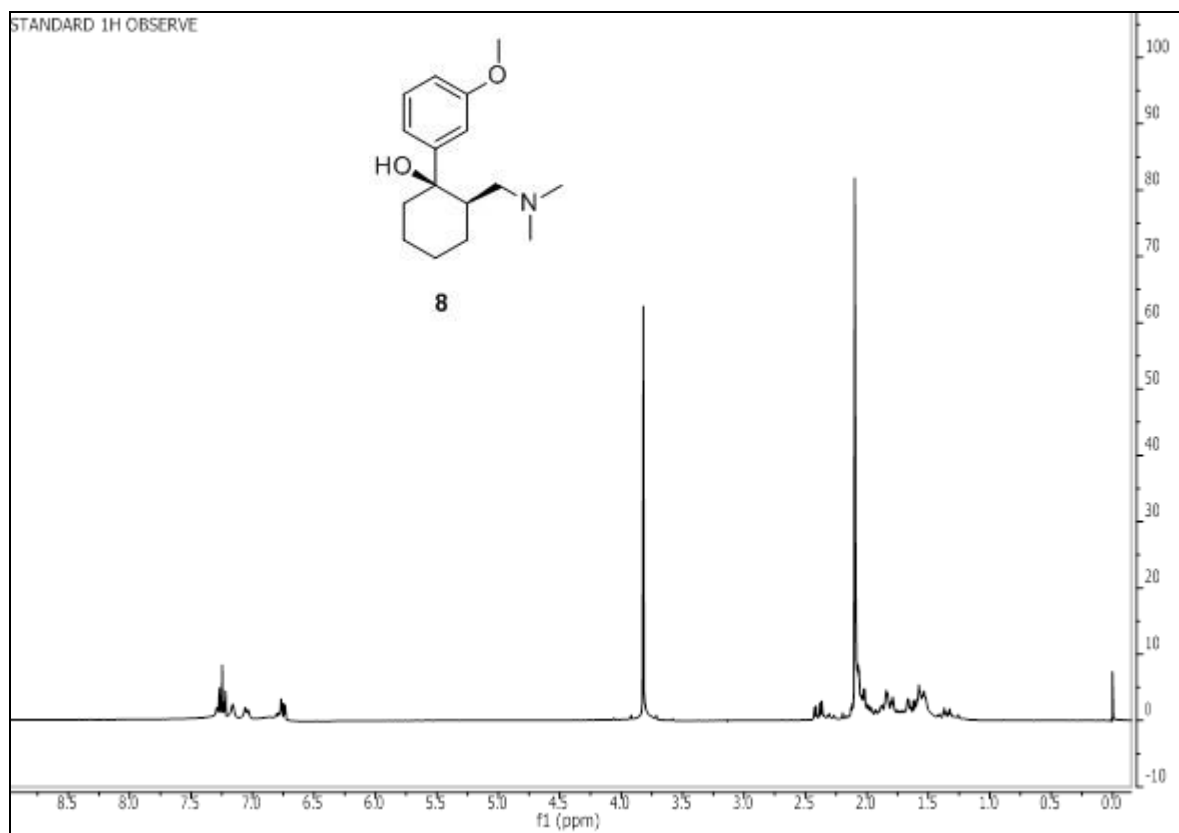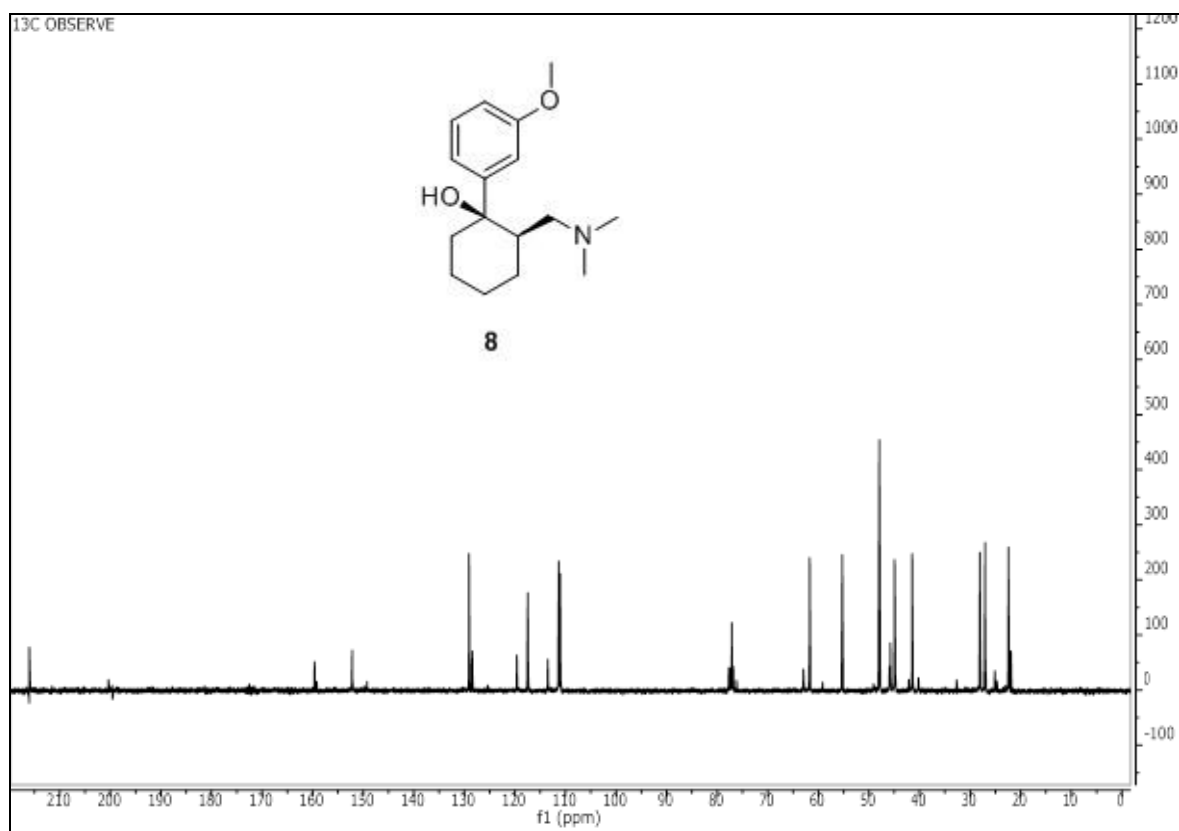

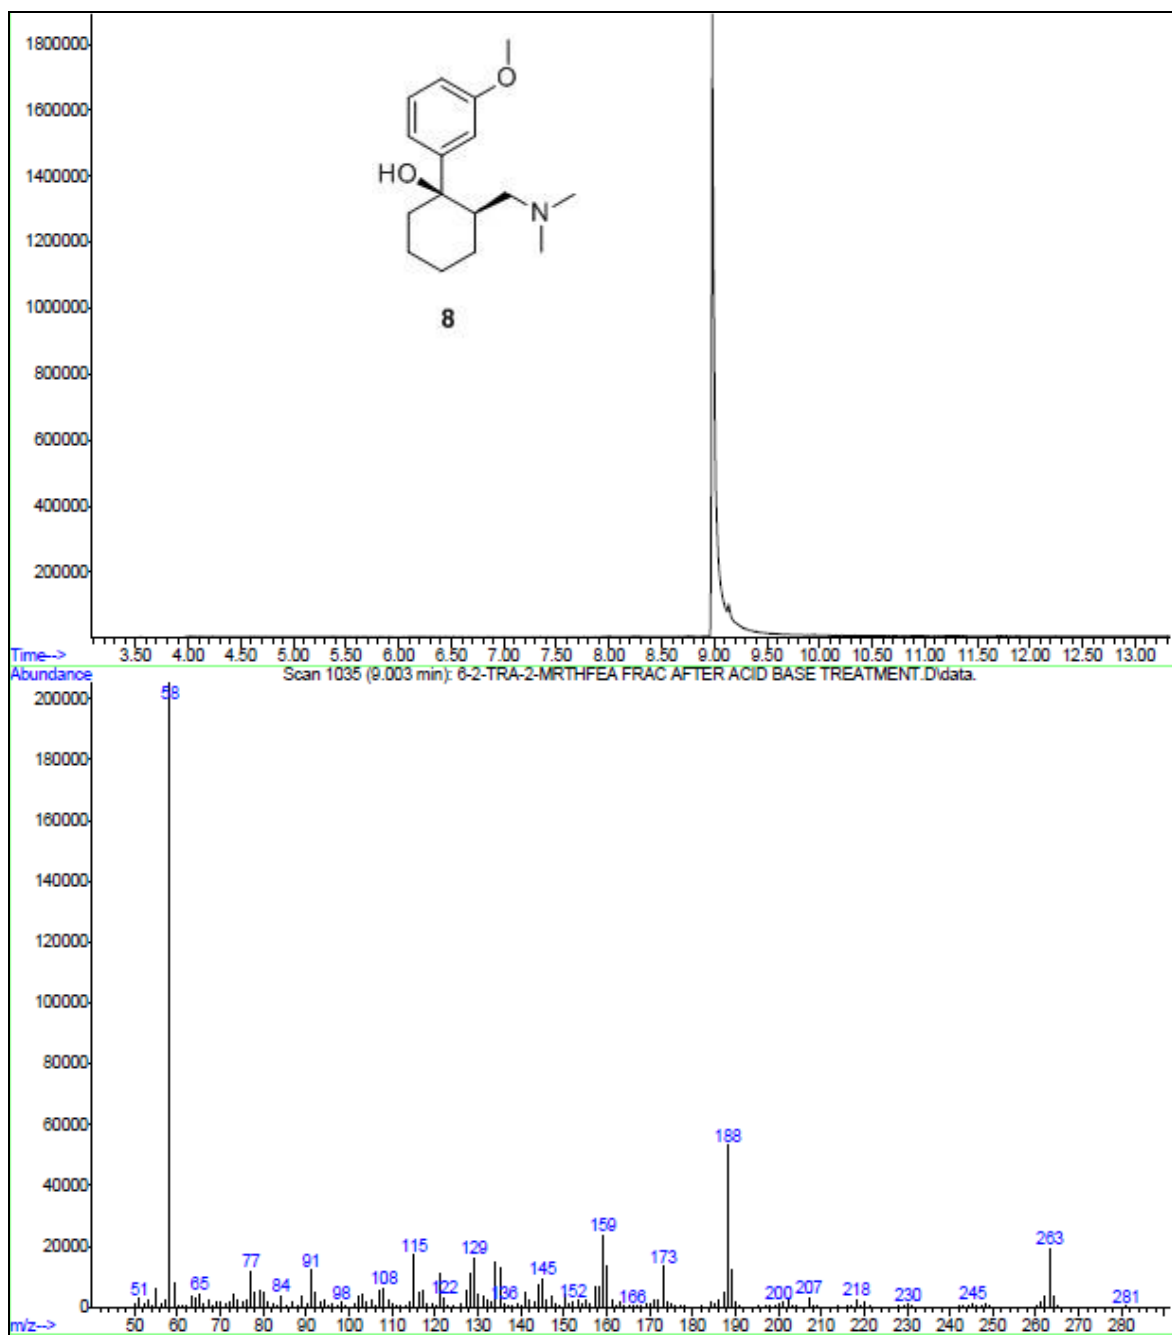



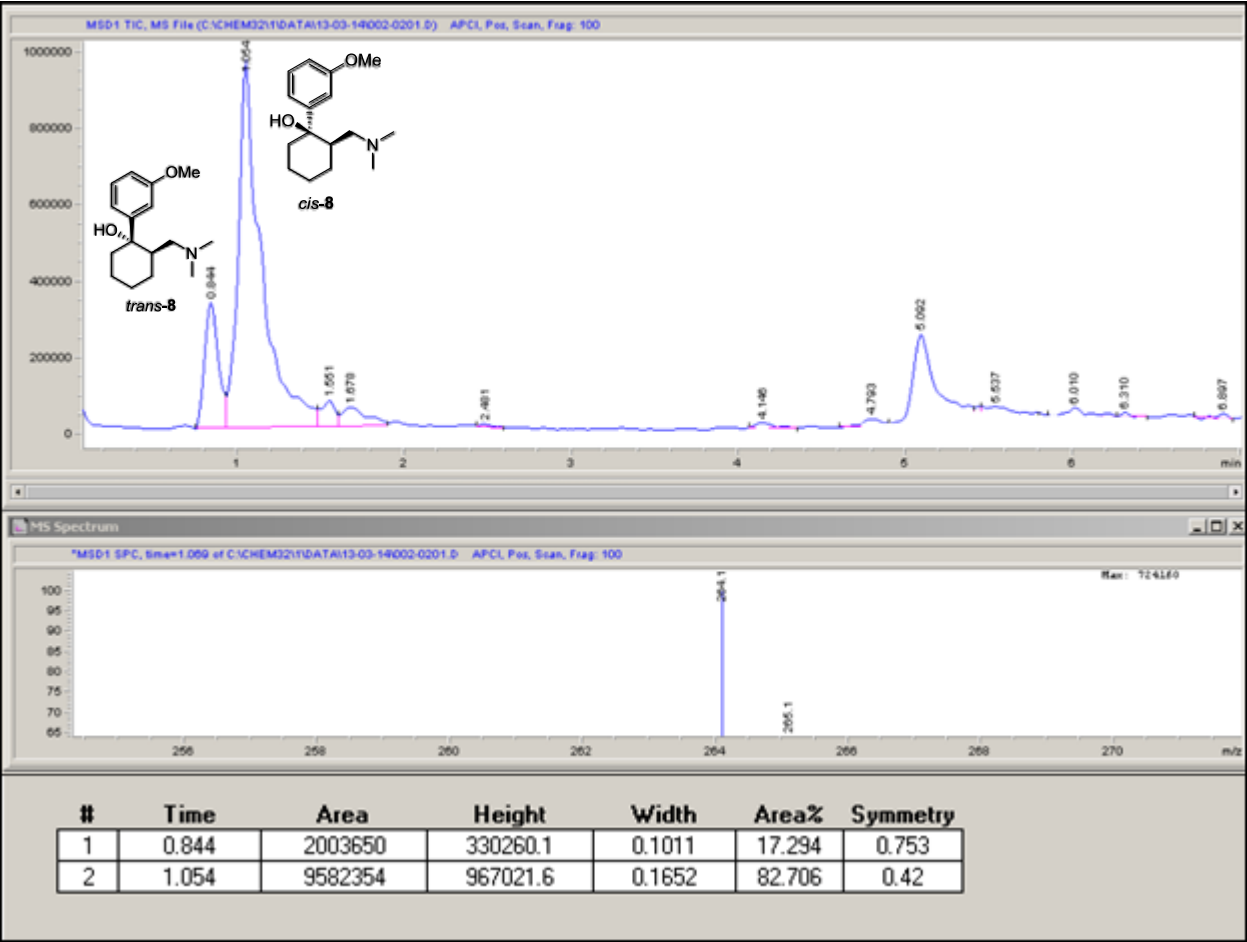

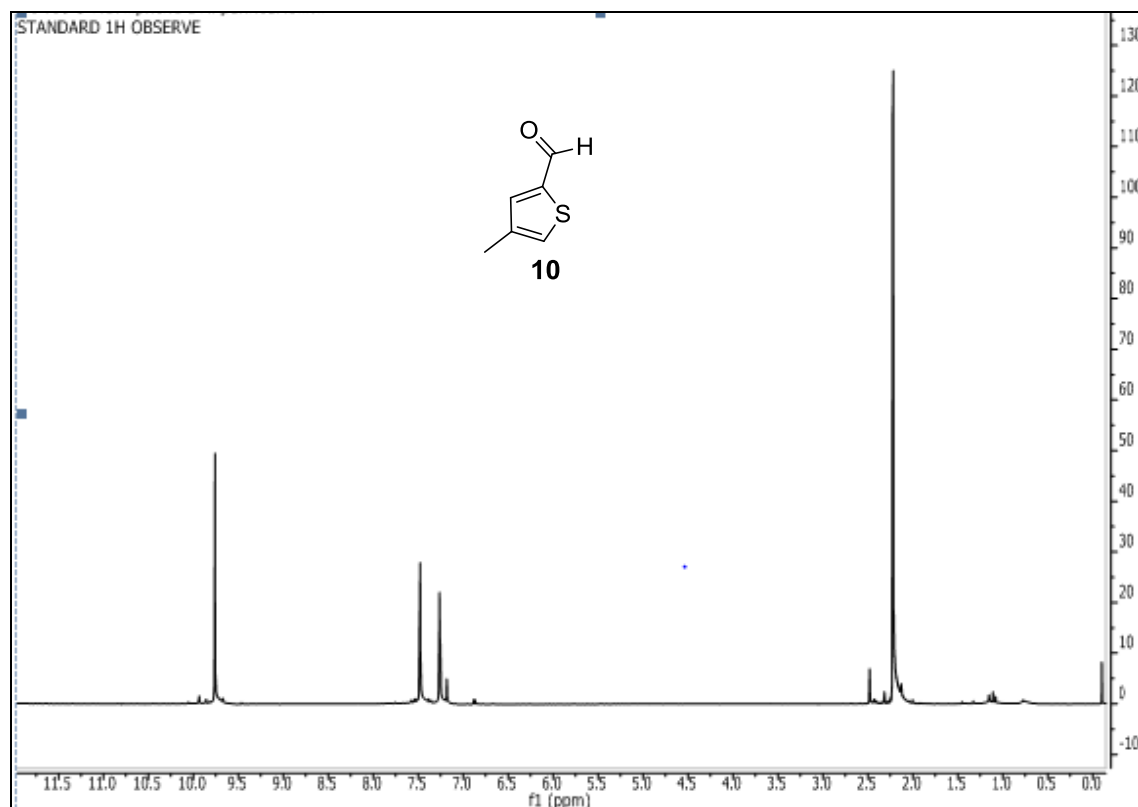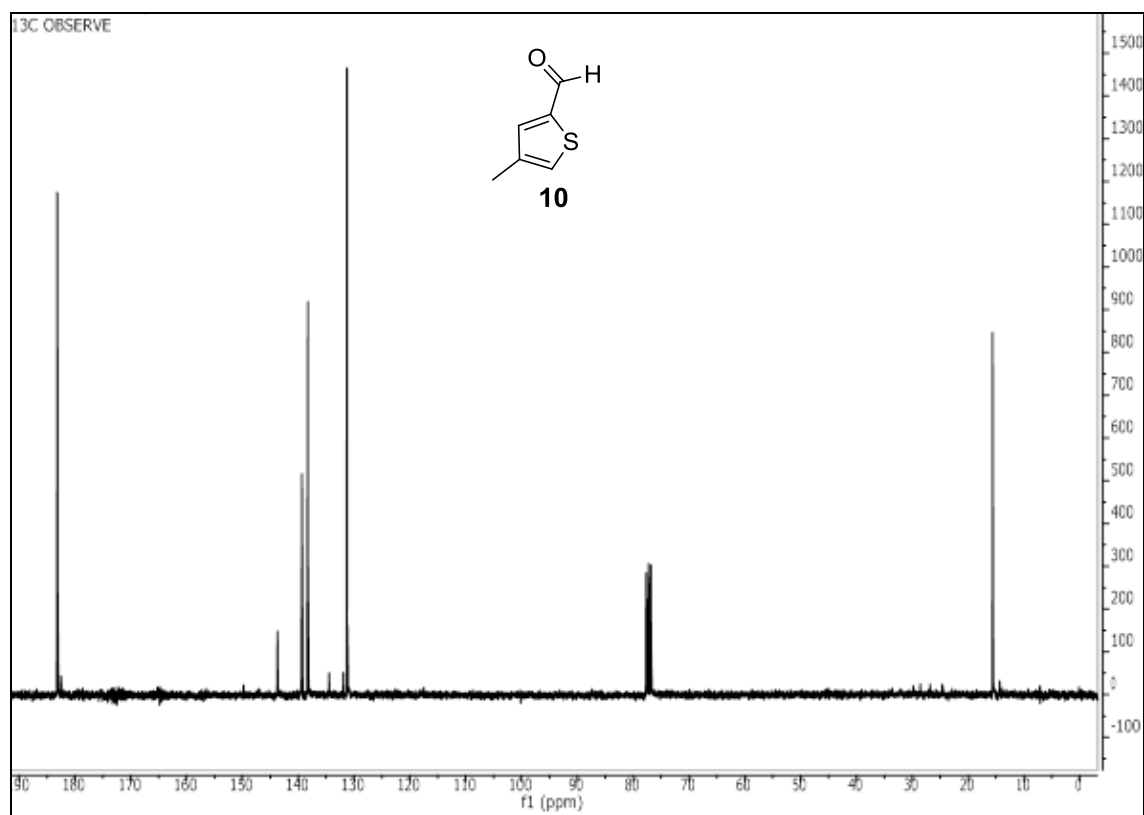

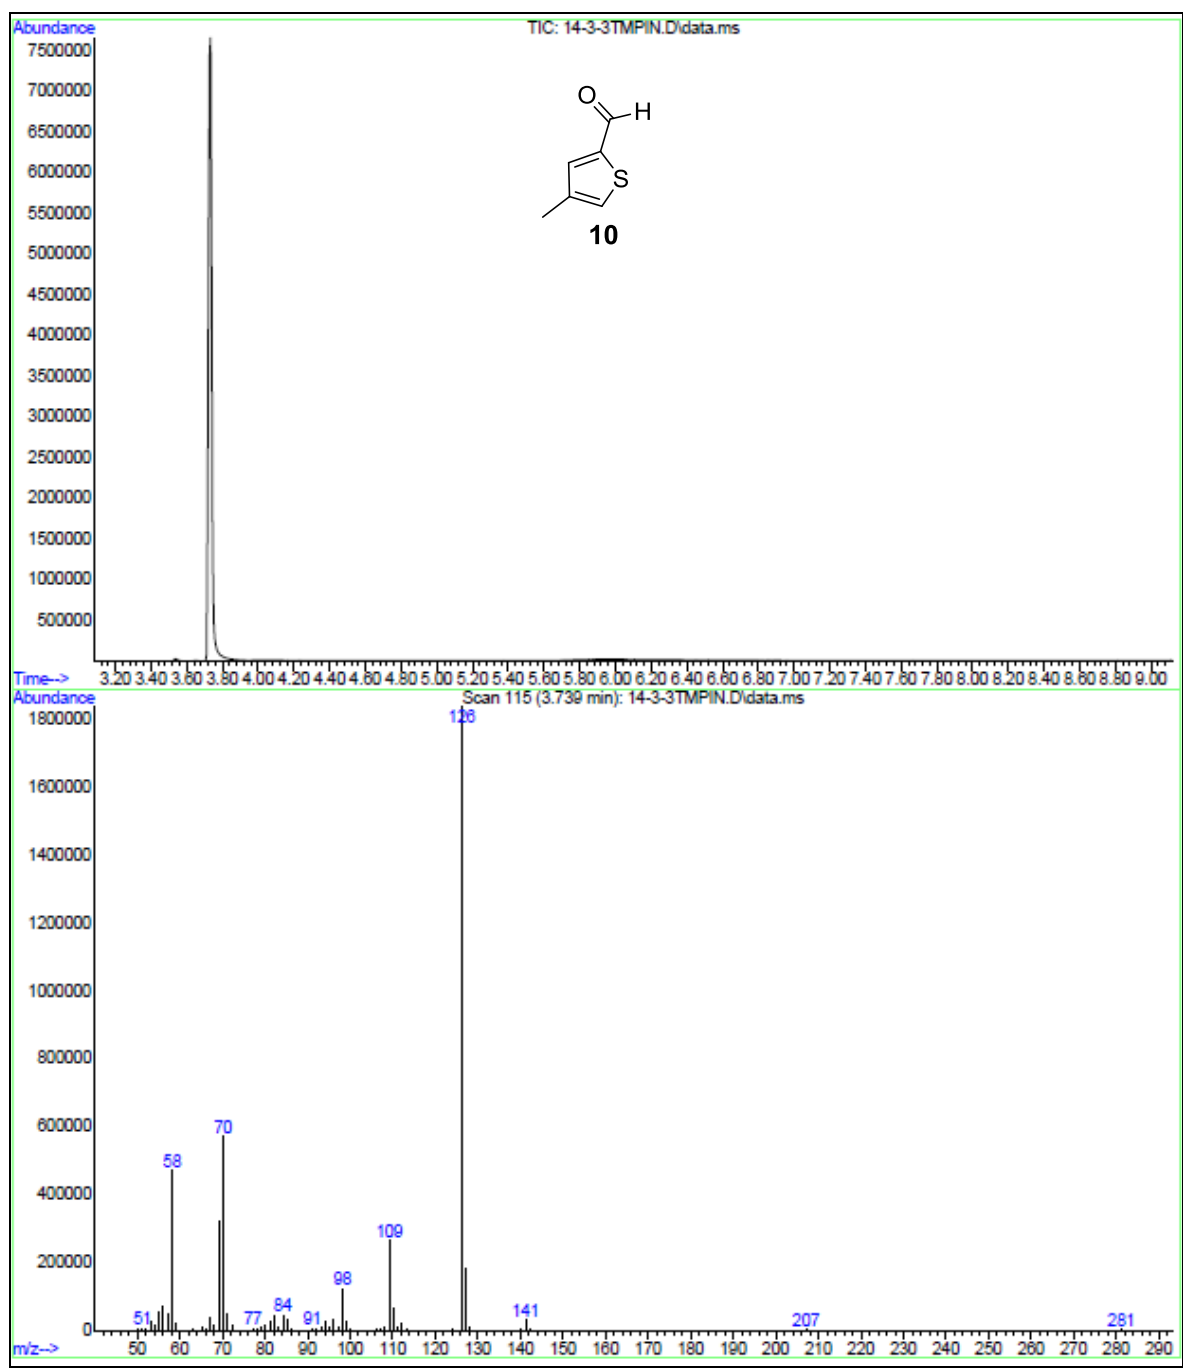

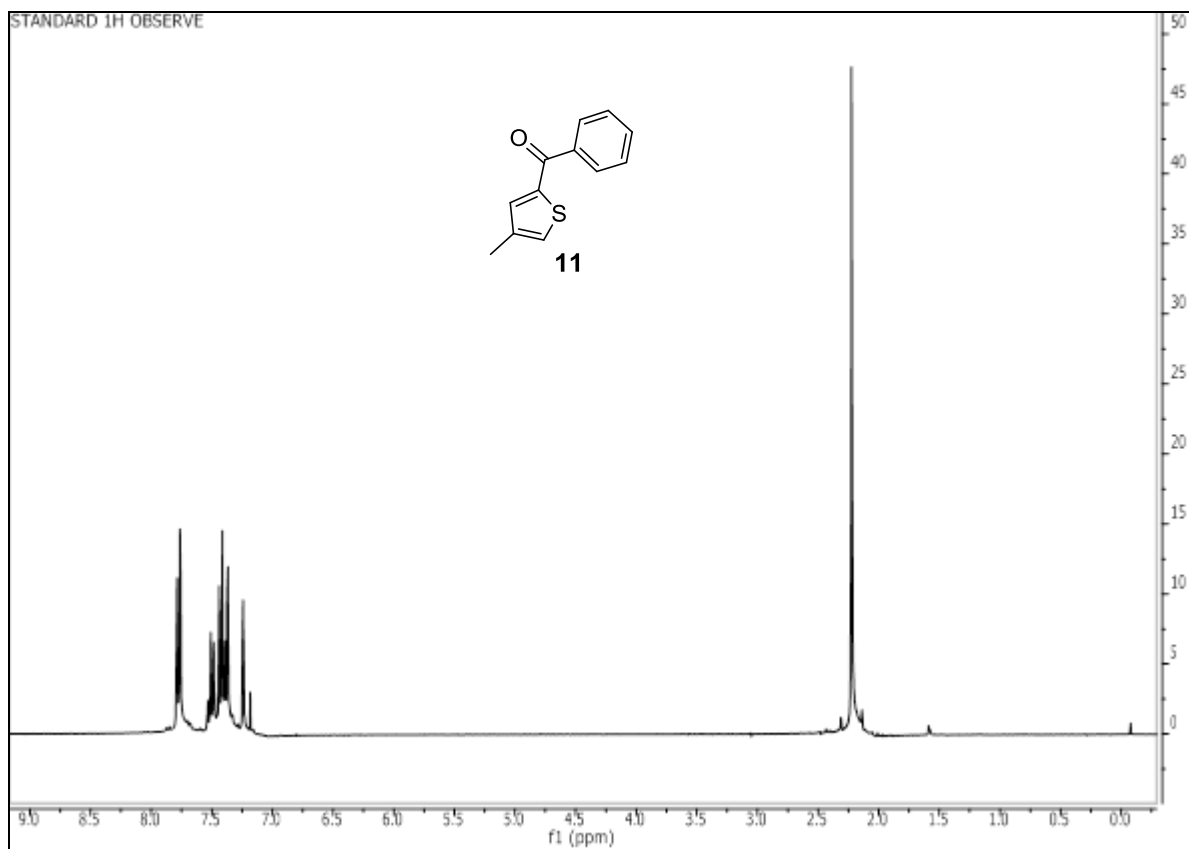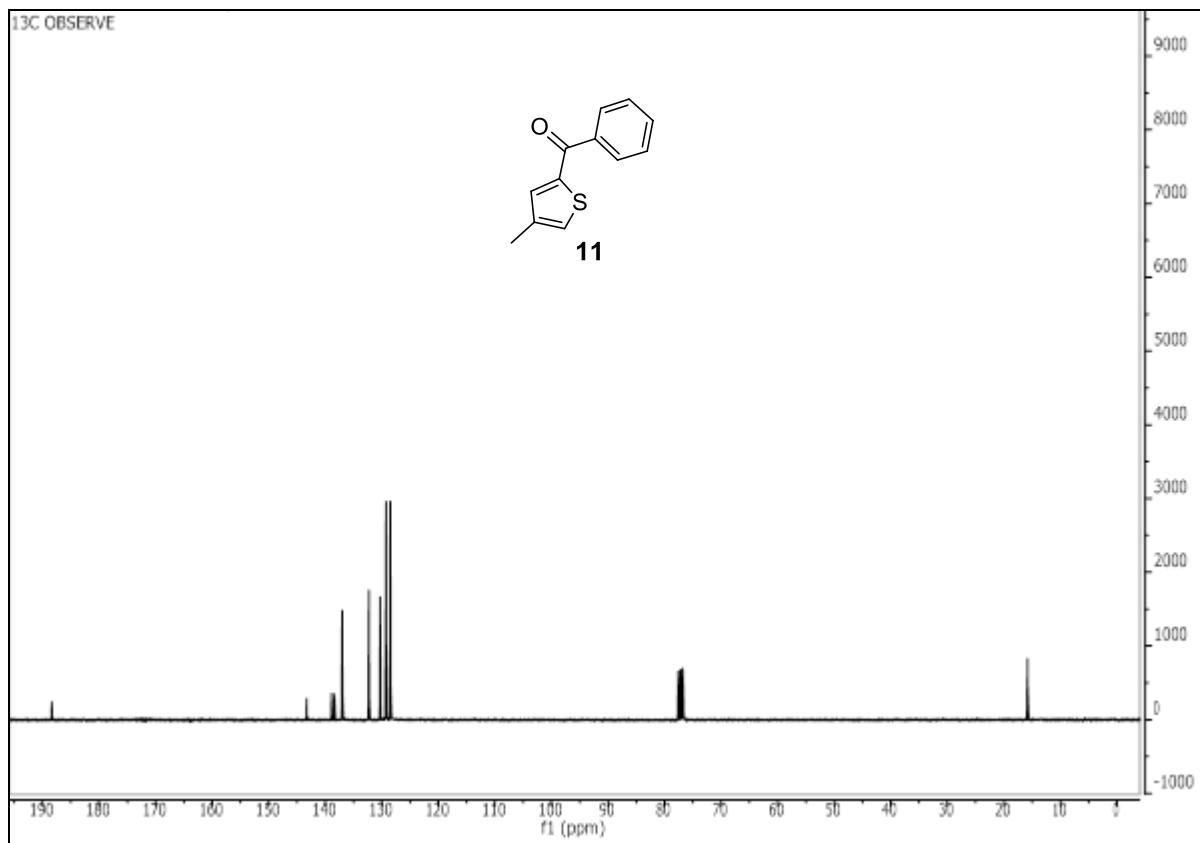

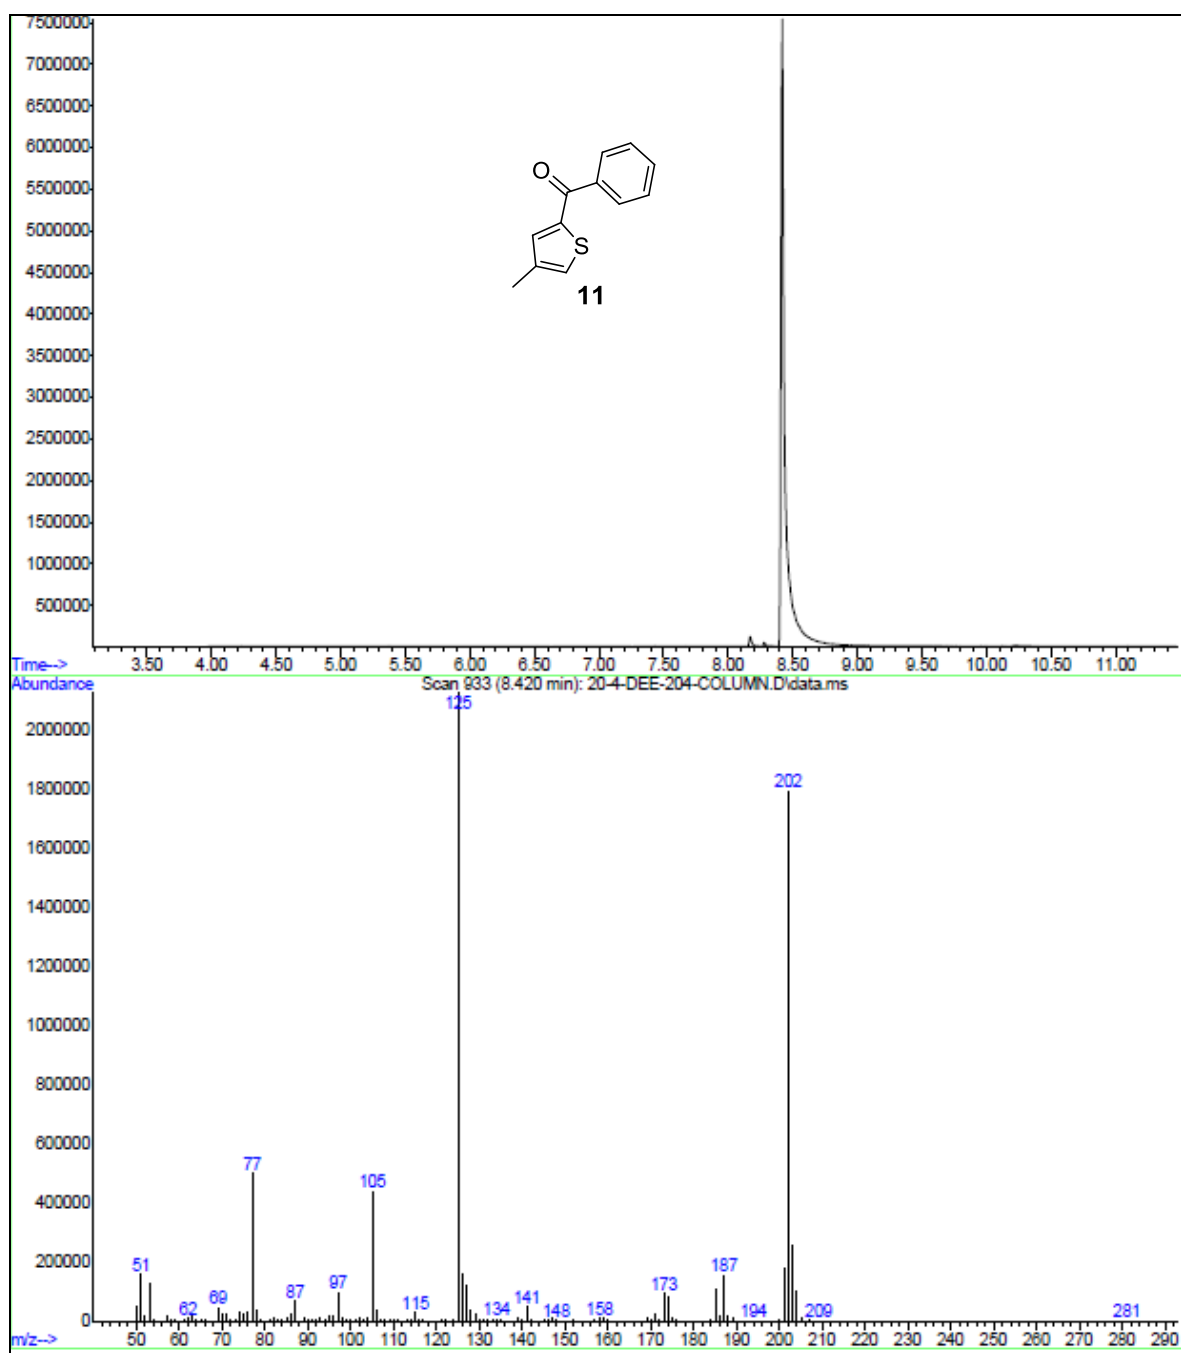

Supplement: c3gc40702k.pdf [file c3gc40702k.pdf]
